# Supplementary material
Source: Elsevier journal article supplement (https://www.sciencedirect.com/science/article/pii/S0212656717303086)
Supplement: mmc1 [file S0212656717303086:mmc1.docx]

19 de Abril del 2018

Departamento de producción editorial 
Elsevier España

En relación a nuestro manuscrito con número APRIM_1569, envió las respuestas a las a las dudas o comentarios realizados:

Q1: Confirmo que los nombres y apellidos de los autores están identificados correctamente.

Q2: Confirmo el cambio.

Q3: Gracias por marcarnos nuestro error. Deberá unificarse de la siguiente manera: “Pas a Pas”. Por lo que las correcciones implicarían la Línea 5, 7, 40, 124, 338, 387, 390, 393 y 409.

Q4: Gracias por marcarnos nuestro error, efectivamente el DOI citado no corresponde a al artículo; sin embargo, al realizar nuestra búsqueda este artículo no tiene un DOI. Por lo que deberá ser citado como aparece en el manuscrito, exceptuando el DOI. Línea 413.

Q5: Confirmo el cambio.

Q6: Confirmo que la estructura de la tabla 1 es correcta.

Q7: Confirmo que la estructura de la tabla 2 es correcta.

Gracias,

**Autor de correspondencia**

Victoria Arija Val.
